# Supplementary material
Source: publisher figshare collection journal article supplement (https://diabetesjournals.figshare.com/articles/dataset/_/19640364)
Supplement: Supplementary file 1 [file 1]

## Appendix

**Appendix Table 1. Patient Characteristics Stratified by Percent Mexican-origin in Census Tract (N=105,257)**

|                                            | Non-Hispanic<br>White N(%) | Latino Low<br>percent<br>Mexican-origin<br>(0.0-22.0) N(%) | Latino Medium<br>percent Mexican-<br>origin (22.0-55.7)<br>N(%) | Latino High<br>percent Mexican-<br>origin (55.7-98.0)<br>N(%) | p-value<br>from chi-<br>square<br>test |
|--------------------------------------------|----------------------------|------------------------------------------------------------|-----------------------------------------------------------------|---------------------------------------------------------------|----------------------------------------|
| <b>Ethnicity</b>                           |                            |                                                            |                                                                 |                                                               | n/a                                    |
| Non-Latino white                           | 76,048 (100)               | 0 (0)                                                      | 0 (0)                                                           | 0 (0)                                                         |                                        |
| Latino                                     | 0 (0)                      | 12,172 (100)                                               | 9,222 (100)                                                     | 7,815 (100)                                                   |                                        |
| <b>Language</b>                            |                            |                                                            |                                                                 |                                                               | n/a                                    |
| English                                    | 76,048 (100)               | 3,132 (25.7)                                               | 1,441 (15.6)                                                    | 1,325 (17.0)                                                  |                                        |
| Spanish                                    | 0 (0)                      | 9,040 (74.3)                                               | 7,781 (84.4)                                                    | 6,490 (83.1)                                                  |                                        |
| <b>Age at first visit</b>                  |                            |                                                            |                                                                 |                                                               | <0.001                                 |
| 50-54 years                                | 4,924 (6.5)                | 620 (5.1)                                                  | 314 (3.4)                                                       | 282 (3.6)                                                     |                                        |
| 55-59 years                                | 29,361 (38.6)              | 4,248 (34.9)                                               | 3,472 (37.7)                                                    | 2,893 (37.0)                                                  |                                        |
| 60-64 years                                | 28,248 (37.1)              | 4,619 (38.0)                                               | 3,719 (40.3)                                                    | 3,151 (40.3)                                                  |                                        |
| 65-69 years                                | 12,740 (16.8)              | 2,386 (19.6)                                               | 1,576 (17.1)                                                    | 1,364 (17.5)                                                  |                                        |
| 70 years or older                          | 775 (1.0)                  | 299 (2.5)                                                  | 141 (1.5)                                                       | 125 (1.6)                                                     |                                        |
| <b>Sex</b>                                 |                            |                                                            |                                                                 |                                                               | <0.001                                 |
| Female                                     | 41,620 (54.7)              | 7,101 (58.3)                                               | 5,564 (60.3)                                                    | 4,610 (59.0)                                                  |                                        |
| Male                                       | 34,428 (45.3)              | 5,071 (41.7)                                               | 3,658 (39.7)                                                    | 3,205 (41.0)                                                  |                                        |
| <b>Insurance Type</b>                      |                            |                                                            |                                                                 |                                                               | <0.001                                 |
| Never insured                              | 12,505 (16.4)              | 1,895 (15.6)                                               | 1,070 (11.6)                                                    | 661 (8.5)                                                     |                                        |
| Some private insurance                     | 13,770 (18.1)              | 1,211 (10.0)                                               | 450 (4.9)                                                       | 262 (3.4)                                                     |                                        |
| Some private and public insurance          | 7,198 (9.5)                | 973 (8.0)                                                  | 557 (6.1)                                                       | 497 (6.4)                                                     |                                        |
| Some public insurance                      | 42,575 (56.0)              | 8,093 (66.5)                                               | 7,145 (77.5)                                                    | 6,395 (81.8)                                                  |                                        |
| <b>Average Visits per Year</b>             |                            |                                                            |                                                                 |                                                               | <0.001                                 |
| Less than 1                                | 19,986 (26.3)              | 2,058 (16.9)                                               | 1,675 (18.2)                                                    | 1,512 (19.4)                                                  |                                        |
| 1 to 2                                     | 27,224 (35.8)              | 3,977 (32.7)                                               | 2,893 (31.4)                                                    | 2,370 (30.3)                                                  |                                        |
| 3 to 4                                     | 13,874 (18.2)              | 2,953 (24.3)                                               | 2,243 (24.3)                                                    | 1,714 (21.9)                                                  |                                        |
| 5 to 9                                     | 10,958 (14.1)              | 2,493 (20.5)                                               | 2,052 (22.3)                                                    | 1,812 (23.2)                                                  |                                        |
| 10 or more                                 | 4,006 (5.3)                | 691 (5.7)                                                  | 359 (3.9)                                                       | 407 (5.2)                                                     |                                        |
| <b>Overweight BMI (BMI &gt;25.0)</b>       |                            |                                                            |                                                                 |                                                               | <0.001                                 |
| Never overweight/obese                     | 14,946 (19.7)              | 1,223 (10.1)                                               | 835 (9.1)                                                       | 662 (8.5)                                                     |                                        |
| Sometimes overweight/obese                 | 12,894 (17.0)              | 2,020 (16.6)                                               | 1,236 (13.4)                                                    | 1,073 (13.7)                                                  |                                        |
| Always overweight/obese                    | 48,208 (63.4)              | 8,929 (73.4)                                               | 7,151 (77.5)                                                    | 6,080 (77.8)                                                  |                                        |
| <b>Percent of US Federal Poverty Level</b> |                            |                                                            |                                                                 |                                                               | <0.001                                 |
| Always ≥138                                | 12,796 (16.8)              | 852 (7.0)                                                  | 405 (4.4)                                                       | 275 (3.5)                                                     |                                        |
| Above & below 138                          | 8,335 (11.0)               | 1,278 (10.5)                                               | 876 (9.5)                                                       | 433 (5.5)                                                     |                                        |
| Always <138                                | 29,395 (38.7)              | 7,737 (63.6)                                               | 5,591 (60.6)                                                    | 4,300 (55.0)                                                  |                                        |
| Never documented                           | 25,522 (33.6)              | 2,305 (18.9)                                               | 2,350 (25.5)                                                    | 2,807 (35.9)                                                  |                                        |
| <b>Diabetes Diagnosis</b>                  |                            |                                                            |                                                                 |                                                               | <0.001                                 |
| No                                         | 60,754 (79.9)              | 7,308 (60.0)                                               | 5,241 (56.8)                                                    | 4,162 (53.3)                                                  |                                        |
| Yes                                        | 15,294 (20.1)              | 4,864 (40.0)                                               | 3,981 (43.2)                                                    | 3,653 (46.7)                                                  |                                        |
| <b>HbA1c test ever</b>                     |                            |                                                            |                                                                 |                                                               | <0.001                                 |
| No                                         | 44,609 (58.7)              | 3,235 (26.6)                                               | 2,229 (24.2)                                                    | 2,245 (28.7)                                                  |                                        |
| Yes                                        | 31,439 (41.3)              | 8,937 (73.4)                                               | 6,993 (75.8)                                                    | 5,570 (71.3)                                                  |                                        |
| <b>Heart disease diagnosis</b>             |                            |                                                            |                                                                 |                                                               | <0.001                                 |
| No                                         | 67,081 (88.2)              | 11,134 (91.5)                                              | 8,538 (92.6)                                                    | 7,167 (91.7)                                                  |                                        |
| Yes                                        | 8,967 (11.8)               | 1,038 (8.5)                                                | 684 (7.4)                                                       | 648 (8.3)                                                     |                                        |

Note: HbA1c=glycated hemoglobin
